# Supplementary material
Source: MDPI journal article supplement (https://www.mdpi.com/2813-0618/2/2/15)
Supplement: s1 [file s1]

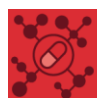**Table S1.** STROBE Statement—Checklist of items that should be included in reports of cross-sectional studies.

| Item No                   | Recommendation                                                                                                                                                                                        | Yes or not or NA | Line number where it is located |
|---------------------------|-------------------------------------------------------------------------------------------------------------------------------------------------------------------------------------------------------|------------------|---------------------------------|
| <b>Title and abstract</b> | (a) Indicate the study's design with a commonly used term in the title or the abstract                                                                                                                | Yes              | 3                               |
|                           | (b) Provide in the abstract an informative and balanced summary of what was done and what was found                                                                                                   | Yes              | 16-31                           |
| <b>Introduction</b>       |                                                                                                                                                                                                       |                  |                                 |
| Background/rationale      | 2 Explain the scientific background and rationale for the investigation being reported                                                                                                                | Yes              | 34-70                           |
| Objectives                | 3 State specific objectives, including any prespecified hypotheses                                                                                                                                    | Yes              | 71-72                           |
| <b>Methods</b>            |                                                                                                                                                                                                       |                  |                                 |
| Study design              | 4 Present key elements of study design early in the paper                                                                                                                                             | Yes              | 77                              |
| Setting                   | 5 Describe the setting, locations, and relevant dates, including periods of recruitment, exposure, follow-up, and data collection                                                                     | Yes              | 78-88                           |
| Participants              | 6 (a) Give the eligibility criteria, and the sources and methods of selection of participants                                                                                                         | Yes              | 90-97                           |
| Variables                 | 7 Clearly define all outcomes, exposures, predictors, potential confounders, and effect modifiers. Give diagnostic criteria, if applicable                                                            | Yes              | 98-112                          |
| Data sources/measurement  | 8* For each variable of interest, give sources of data and details of methods of assessment (measurement). Describe comparability of assessment methods if there is more than one group               | Yes              | 113-118                         |
| Bias                      | 9 Describe any efforts to address potential sources of bias                                                                                                                                           | Yes              | 102-103, 106-107, 111-112       |
| Study size                | 10 Explain how the study size was arrived at                                                                                                                                                          | Yes              | 85-88, 91-93                    |
| Quantitative variables    | 11 Explain how quantitative variables were handled in the analyses. If applicable, describe which groupings were chosen and why                                                                       | Yes              | 113-118                         |
| Statistical methods       | 12 (a) Describe all statistical methods, including those used to control for confounding                                                                                                              | Yes              | 120-134                         |
|                           | (b) Describe any methods used to examine subgroups and interactions                                                                                                                                   | Yes              | 123-125                         |
|                           | (c) Explain how missing data were addressed                                                                                                                                                           | NA               | --                              |
|                           | (d) If applicable, describe analytical methods taking account of sampling strategy                                                                                                                    | Yes              | 132-134                         |
|                           | (e) Describe any sensitivity analyses                                                                                                                                                                 | Yes              | 130-131                         |
| <b>Results</b>            |                                                                                                                                                                                                       |                  |                                 |
| Participants              | 13* (a) Report numbers of individuals at each stage of study—eg numbers potentially eligible, examined for eligibility, confirmed eligible, included in the study, completing follow-up, and analysed | Yes              | 140                             |
|                           | (b) Give reasons for non-participation at each stage                                                                                                                                                  | Yes              | 151                             |
|                           | (c) Consider use of a flow diagram                                                                                                                                                                    | Yes              | 151                             |
| Descriptive data          | 14* (a) Give characteristics of study participants (eg demographic, clinical, social) and information on exposures and potential confounders                                                          | Yes              | 140-150                         |
|                           | (b) Indicate number of participants with missing data for each variable of interest                                                                                                                   | NA               | --                              |

|                          |     |                                                                                                                                                                                                              |     |                  |
|--------------------------|-----|--------------------------------------------------------------------------------------------------------------------------------------------------------------------------------------------------------------|-----|------------------|
| Outcome data             | 15* | Report numbers of outcome events or summary measures                                                                                                                                                         | Yes | 157              |
| Main results             | 16  | (a) Give unadjusted estimates and, if applicable, confounder-adjusted estimates and their precision (eg, 95% confidence interval). Make clear which confounders were adjusted for and why they were included | Yes | 204              |
|                          |     | (b) Report category boundaries when continuous variables were categorized                                                                                                                                    | Yes | 157              |
|                          |     | (c) If relevant, consider translating estimates of relative risk into absolute risk for a meaningful time period                                                                                             | NA  | --               |
| Other analyses           | 17  | Report other analyses done—eg analyses of subgroups and interactions, and sensitivity analyses                                                                                                               | Yes | 204              |
| <b>Discussion</b>        |     |                                                                                                                                                                                                              |     |                  |
| Key results              | 18  | Summarise key results with reference to study objectives                                                                                                                                                     | Yes | 222              |
| Limitations              | 19  | Discuss limitations of the study, taking into account sources of potential bias or imprecision. Discuss both direction and magnitude of any potential bias                                                   | Yes | 241-245, 291-299 |
| Interpretation           | 20  | Give a cautious overall interpretation of results considering objectives, limitations, multiplicity of analyses, results from similar studies, and other relevant evidence                                   | Yes | 280-291          |
| Generalisability         | 21  | Discuss the generalisability (external validity) of the study results                                                                                                                                        | Yes | 302-303          |
| <b>Other information</b> |     |                                                                                                                                                                                                              |     |                  |
| Funding                  | 22  | Give the source of funding and the role of the funders for the present study and, if applicable, for the original study on which the present article is based                                                | Yes | 322              |
